# Supplementary material
Source: publisher figshare collection journal article supplement (https://asha.figshare.com/articles/dataset/_/14219777)
Supplement: Supplementary file 1 [file 2]

# Desarrollo Temprano de Competencias Emocionales: Una Herramienta para Niños(as) con Necesidades Complejas de Comunicación (NCC)

Na, Wilkinson, Epstein, Rangel-Rodríguez, Townsend, Thistle, Feldman, Blackstone (2014)

Versión original (2012)

Versión revisada (2013)

Versión actualizada (2014)

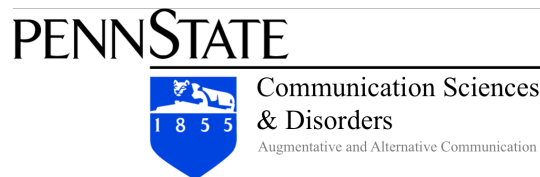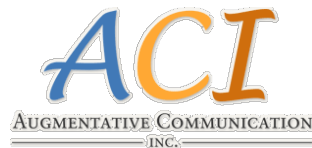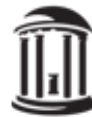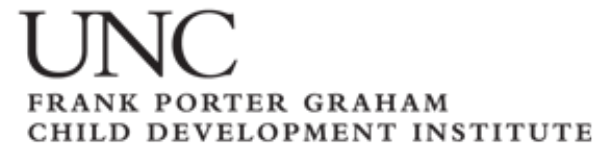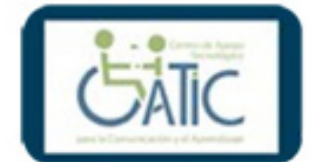

Información de contacto: Ji Young Na ([edectool@gmail.com](mailto:edectool@gmail.com))

Información de contacto (versión en español): Gabriela A. Rangel-Rodríguez ([gabriela.rangelr@gmail.com](mailto:gabriela.rangelr@gmail.com))

### **SOBRE LA HERRAMIENTA EDEC** [por sus siglas en inglés: Early Development of Emotional Competence: A Tool for Children with Complex Communication Needs (CCN)]

#### *¿Qué es la herramienta EDEC?*

La herramienta EDEC es un instrumento descriptivo diseñado para obtener información sobre cómo las familias y los profesionales hablan sobre las emociones con los niños(as) con necesidades complejas de comunicación (NCC). Consiste en una entrevista realizada por un profesional a la familia del niño(a) así como a otros profesionales que convivan con ellos.

#### *¿Por qué desarrollamos la herramienta EDEC?*

La herramienta EDEC busca fomentar conciencia sobre la relación entre el lenguaje y la competencia emocional, así como garantizar que la intervención de comunicación en el niño(a) incluya el lenguaje para hablar de las emociones en formas que sean consistentes con los valores y objetivos de la familia. No se ha diseñado para propósitos de prescripción, ni como un instrumento de referencia normativa. Por el contrario, se pretende que los profesionales colaboren con miembros de la familia y con otros profesionales para recabar información que puede ser útil para apoyar la comunicación sobre la emoción.

#### *Población Objetivo*

La herramienta EDEC fue diseñada para ser aplicada a niños(as) (desde nacimiento hasta 10 años) con NCC, que tengan limitaciones importantes en habilidades de lenguaje y habla debido a diversas etiologías (p.ej. parálisis cerebral, síndrome de Down, etc.). No se ha llevado a cabo por los autores una extensión de la herramienta en personas con mayor edad ni con algún trastorno del espectro autista.

#### *¿Quién puede usar la herramienta EDEC?*

Especialistas en lenguaje y habla u otros profesionales (p.ej. terapeutas ocupacionales, terapeutas físicos) que trabajan con niños(as) con NCC, pueden usar la herramienta EDEC con el fin de entrevistar a los cuidadores del niño(a) u otros profesionales (p.ej. maestros). Se recomienda entrevistar tanto al cuidador como al maestro/terapeuta con el fin de tener una mejor comprensión acerca de las características del niño(a) en diferentes contextos.

#### *¿Cuánto tiempo tardará?*

Probablemente tardará de cuarenta y cinco minutos a una hora para completar la entrevista usando la herramienta EDEC. Entrevistas previas llevaron de treinta minutos a una hora. Si se acaba el tiempo, se puede responder la entrevista en partes y reanudarla después.

#### *Idiomas*

La herramienta EDEC ha sido diseñada para ser utilizada en diferentes idiomas. Actualmente, se encuentran versiones disponibles en danés, inglés, coreano, mandarín, chino y español. Las versiones en holandés, francés y alemán estarán disponibles en el futuro. Favor de ponerse en contacto con el autor para otros idiomas.

#### *¿Versión en Línea?*

La herramienta EDEC también se encuentra disponible en línea. Para acceder a ésta, es necesario utilizar un enlace proporcionado por el autor. Por favor, póngase en contacto con el autor si está interesado.

## **CONTENIDOS Y ORGANIZACIÓN**

- Esta herramienta consta de dos secciones. La sección I pregunta a los entrevistados como los padres/cuidadores y/o profesores perciben el temperamento del niño(a). La sección II realiza al entrevistado cuestionamientos acerca del niño(a) y su capacidad, actualmente, para expresar emociones/sentimientos, así como preguntas sobre cómo los padres y cuidadores expresan emociones en el contexto familiar y si los padres/cuidadores hablan con el niño(a) sobre emociones/sentimientos.
- Recomendamos comenzar por la SECCIÓN I ya que la información recopilada en la SECCIÓN I puede ayudar a que el entrevistador tenga una mejor comprensión del niño(a) antes de hablar de la expresión y reconocimiento emocional del mismo.
- Los ejemplos sugeridos en cada pregunta se pueden proporcionar al padre/cuidador o maestro en caso de ser necesario.

## DESARROLLO TEMPRANO DE COMPETENCIAS EMOCIONALES: UNA HERRAMIENTA PARA NIÑOS(AS) CON NECESIDADES COMPLEJAS DE COMUNICACIÓN (NCC)

(Na, Wilkinson, Epstein, Rangel-Rodríguez, Townsend, Thistle, Feldman, & Blackstone, 2014)

**INFORMACIÓN GENERAL.** Por favor ingrese toda la información que se presenta a continuación.

**Niño/a (Iniciales):**

**Fecha de Nacimiento:**

**Nacionalidad:**

**Diagnóstico del niño/a:**

**Fecha de la entrevista:**

**Examinador (Iniciales):**

**Profesión:**

**Informante (Iniciales):**

**Relación (p.e. padre, maestro):**

**Idioma utilizado en la entrevista:**

**Danés**

**Holandés**

**Inglés**

**Francés**

**Alemán**

**Coreano**

**Español**

**Otro \_\_\_\_\_**

**Este es el final de INFORMACIÓN GENERAL.**

**Por favor pase a la SECCIÓN I.**

## SECCIÓN I. PREGUNTAS SOBRE EL TEMPERAMENTO / CARACTERÍSTICAS COMPORTAMENTALES (Adaptado de Caspi & Shiner, 2008)

[Temperamento se refiere a las características de una persona que afectan su pensamiento, comportamiento y su manera de reaccionar ante distintas experiencias.] **El examinador realiza preguntas al informante acerca del niño/a con necesidades complejas de comunicación como se indica a continuación.**

### 1a. Descripción básica – pregunta abierta

**“Estamos interesados en aprender un poco acerca de la personalidad en general de {nombre}. ¿Puede describir a {nombre} un poco?”**

*Escribe los adjetivos que el cuidador ofrece espontáneamente*

### 1b. Descripción básica – pregunta guiada

*El cuidador probablemente ha expresado algunos adjetivos de la lista de la derecha. No pregunte por los que los padres ya han dicho. En cambio, aquí vamos a solicitar sólo la información que el cuidador no mencionó.*

**“Muchas gracias – eso es de mucha ayuda. Hay algunas otras características de personalidad que me gustaría preguntar.”**

**“Ahora, le voy a dar pares de palabras que describen la personalidad. Me puede decir si, en general, la personalidad de su hijo/a es similar a una u otra de esas descripciones. Si {nombre} cae a la mitad, sólo dígame eso. Y por supuesto, si no está seguro, hágamelo saber.”**

Las respuestas a cada una se ajustarán a la siguiente escala: Usualmente como la elección a  
Usualmente como la elección b  
En ninguno de los extremos (ambos)  
No estoy seguro (no sé)

|                                                                  | USUALMENTE                     |                                  | USUALMENTE |       |
|------------------------------------------------------------------|--------------------------------|----------------------------------|------------|-------|
| 1. Actividad                                                     | 1a. Activo-----AMBOS-----      | 1b. Relajado                     |            | NO SÉ |
| 2. Ritmo <sup>1</sup><br>(patrón para comer/dormir)              | 2a. Predecible-----AMBOS-----  | 2b. Impredecible<br>(Fluctuante) |            | NO SÉ |
| 3. Acercamiento/separación                                       | 3a. Tímido-----AMBOS-----      | 3b. Extrovertido                 |            | NO SÉ |
| 4. Adaptabilidad<br>(transición)                                 | 4a. Adaptable-----AMBOS-----   | 4b. Testarudo                    |            | NO SÉ |
| 5. Intensidad de reacciones                                      | 5a. Carismático-----AMBOS----- | 5b. Reservado                    |            | NO SÉ |
| 6. Estado de ánimo                                               | 6a. Pesimista-----AMBOS-----   | 6b. Optimista                    |            | NO SÉ |
| 7. Persistencia<br>(Periodos de atención)                        | 7a. Largo-----AMBOS-----       | 7b. Corto                        |            | NO SÉ |
| 8. Umbral Sensorial <sup>2</sup><br>(sensible a la estimulación) | 8a. Sensible-----AMBOS-----    | 8b. Hiposensible/ignora          |            | NO SÉ |
| 9. Distractibilidad                                              | 9a. Distráido-----AMBOS-----   | 9b. Atento                       |            | NO SÉ |

### COMENTARIOS

### 2. Socialización

**“¿{nombre} parece disfrutar estar con otras personas?”**

SI

NO

NO SÉ

COMENTARIOS

<sup>1</sup> Se busca obtener información sobre qué tan predecibles son los patrones de sueño, comida, etc. del niño(a).

<sup>2</sup> Información relacionada con la sensibilidad del niño(a) ante estímulos sensoriales (auditivos, táctiles, etc.), p.ej. si muestra hipersensibilidad ante ciertos ruidos.

|                                                                                                                                                                                                                                                                                                                                                                      |                |               |            |       |             |             |
|----------------------------------------------------------------------------------------------------------------------------------------------------------------------------------------------------------------------------------------------------------------------------------------------------------------------------------------------------------------------|----------------|---------------|------------|-------|-------------|-------------|
|                                                                                                                                                                                                                                                                                                                                                                      |                |               |            |       |             |             |
| <b>3. Acercamiento social / afecto</b><br><b>“En general, ¿describiría a {nombre} como alguien afectivo/cariñoso?”</b><br><b>“¿Con quién expresa mayor afecto {nombre}?”</b><br><i>escriba la respuesta de la segunda pregunta en la sección “COMENTARIOS”</i>                                                                                                       |                | SI            | NO         | NO SÉ | COMENTARIOS |             |
|                                                                                                                                                                                                                                                                                                                                                                      |                |               |            |       |             |             |
| <b>4. Personas con las que el niño/a tiene un fuerte lazo afectivo</b><br><b>“¿Con quién en particular {nombre} muestra un lazo afectivo fuerte y de qué manera lo expresa, aún si lo demuestra de formas diferentes al afecto? Por ejemplo, ¿{nombre} muestra angustia cuando alguna persona en especial se va o muestra bienestar cuando esa persona regresa?”</b> |                |               |            |       | COMENTARIOS |             |
|                                                                                                                                                                                                                                                                                                                                                                      |                |               |            |       |             |             |
| <b>5. Interacción con pares</b><br><b>“Describa como {nombre} interactúa con sus compañeros. Por ejemplo, ¿intenta jugar con sus compañeros? En general, ¿se lleva bien con ellos cuando juegan?”</b>                                                                                                                                                                |                |               |            |       | COMENTARIOS |             |
|                                                                                                                                                                                                                                                                                                                                                                      |                |               |            |       |             |             |
| <b>6. Reacción a extraños</b><br><b>“¿Con qué frecuencia {nombre} muestra miedo a extraños? ¿Muestra miedo durante situaciones poco familiares? ¿Podría dar un ejemplo de cómo reacciona {nombre} ante una persona o situación nueva?”</b>                                                                                                                           | FRECUENTEMENTE | ALGUNAS VECES | CASI NUNCA | NUNCA | NO SÉ       | COMENTARIOS |
|                                                                                                                                                                                                                                                                                                                                                                      |                |               |            |       |             |             |
| <b>7. Irascibilidad</b><br><b>“Muchos niños/as pasan al menos por una fase en la que presentan berrinches/rabietas. ¿{nombre} hace rabietas/berrinches?”</b><br><i>Si el cuidador responde SI, pregunte: “¿Con qué frecuencia (p.ej. 1 al día)? Cuando ocurre, ¿cómo reacciona usted u otros adultos?”</i>                                                           |                |               |            |       | COMENTARIOS |             |
|                                                                                                                                                                                                                                                                                                                                                                      |                |               |            |       |             |             |

|                                                                                                                                                                                                                                                                                                                                                                                                          |                           |
|----------------------------------------------------------------------------------------------------------------------------------------------------------------------------------------------------------------------------------------------------------------------------------------------------------------------------------------------------------------------------------------------------------|---------------------------|
| <p><b>8. Autoagresión</b></p> <p>“Cuando {nombre} está de mal humor/molesto, ¿Ha intentado {nombre} hacer algo para lastimarse intencionalmente? Algunas veces, los niños/as se muerden las manos o se pellizcan a sí mismos.</p> <p><i>Si el cuidador responde SI, pregunte: “¿Con qué frecuencia (p.ej. 1 al día)? Cuando ocurre, ¿qué hace {nombre}?, ¿cómo reacciona usted u otros adultos?”</i></p> | <p><b>COMENTARIOS</b></p> |
| <p><b>9. Comportamiento agresivo</b></p> <p>“¿Alguna vez {nombre} ha hecho algo intencionalmente para lastimar a otras personas como morder, pegar o pellizcar a otros?”</p> <p><i>Si el cuidador responde SI, pregunte: “¿Con qué frecuencia (p.e. 1 al día)? Cuando ocurre, ¿qué hace {nombre}?, ¿cómo reacciona usted u otros adultos?”</i></p>                                                       | <p><b>COMENTARIOS</b></p> |
| <p><b>10. Daño a objetos ajenos</b></p> <p>“¿Alguna vez {nombre} ha dañado intencionalmente objetos ajenos?”</p> <p><i>Si el cuidador responde SI, pregunte: “¿Con qué frecuencia (p.e. 1 al día)? Cuando ocurre, ¿qué hace {nombre}?, ¿cómo reacciona usted u otros adultos?”</i></p>                                                                                                                   | <p><b>COMENTARIOS</b></p> |
| <p><b><u>Resumen</u></b></p> <p>Realice un resumen de lo que el padre/cuidador acaba de decir, incluyendo 2-3 rasgos u comportamientos positivos.</p> <p><i>"Me gustaría tomar un momento para revisar lo que llevamos hasta ahora. Usted comentó que {nombre} es {2-3 rasgos o comportamientos positivos}. ¿Hay algo más que olvide?"</i></p>                                                           | <p><b>COMENTARIOS</b></p> |

Este es el final de la SECCIÓN I.  
Por favor pase a la SECCIÓN II.

## SECCIÓN II. PREGUNTAS SOBRE EL NIÑO/A CON NECESIDADES COMPLEJAS DE COMUNICACIÓN Y LA DINÁMICA FAMILIAR

Lista adaptada por los investigadores identificando emociones “primarias” y “secundarias/terciarias” (Ekman, Friesen & Ellsworth, 1972 and Parrott, 2001)  
En esta sección, los padres/cuidadores pueden informar directamente sobre cómo la familia maneja sus emociones en presencia del niño/a. Maestros y clínicos reportarán sus observaciones.

### 1a. Emociones comunes que el niño/a expresa

**“Primero, me gustaría hablar un poco acerca de qué emociones expresa su hijo/a. Estoy interesado/a en saber qué tan frecuente su hijo/a expresa emociones como amor, enojo y así sucesivamente. Me gustaría que pensara qué tanto su hijo(a) expresa cada emoción, si es frecuentemente, algunas veces, raramente o nunca. Si no está seguro, sólo hágamelo saber, ¿de acuerdo?”**

**“¿Con qué frecuencia su hijo/a expresa [aquí, pase por cada emoción presentada en el punto 1a, una por una]?”**

*Si el informante responde “no estoy seguro”, por favor pregunte ¿Por qué no está seguro?” Por ejemplo, tal vez el informante no ha observado el comportamiento o tal vez cree que el niño/a no tiene la oportunidad de demostrarlo.*

| 1a. EMOCIONES COMUNES | FRECUENTE-MENTE | ALGUNAS VECES | RARAMENTE | NUNCA | NO ESTOY SEGURO | COMENTARIOS |
|-----------------------|-----------------|---------------|-----------|-------|-----------------|-------------|
| Afecto/Amor           |                 |               |           |       |                 |             |
| Enojo/Enfado          |                 |               |           |       |                 |             |
| Disgusto/Asco         |                 |               |           |       |                 |             |
| Miedo                 |                 |               |           |       |                 |             |
| Alegría/ Felicidad    |                 |               |           |       |                 |             |
| Tristeza              |                 |               |           |       |                 |             |
| Sorpresa              |                 |               |           |       |                 |             |

### 1b. Otras emociones que el niño/a expresa.

**“Gracias. Estas emociones son consideradas las primeras en desarrollarse. Me gustaría hablar de otras emociones que generalmente se desarrollan más tarde o que pueden ser más difíciles de expresar. Mientras las vaya leyendo, hágame saber si alguna vez ha notado que su hijo las exprese.”**

**“¿Tu hijo/a expresa [aquí, pase por cada emoción presentada en el punto 1b, una por una]?”**

| OTRAS EMOCIONES        | SI | NO | COMENTARIOS |                        | SI | NO | COMENTARIOS |
|------------------------|----|----|-------------|------------------------|----|----|-------------|
| Adoración <sup>3</sup> |    |    |             | Celos/Envidia          |    |    |             |
| Asombro                |    |    |             | Orgullo                |    |    |             |
| Entusiasmo             |    |    |             | Nerviosismo/Angustia   |    |    |             |
| Decepción              |    |    |             | Irritación/Frustración |    |    |             |
| Emoción                |    |    |             | Vergüenza              |    |    |             |

<sup>3</sup> Amor muy profundo o admiración extrema

\*Si el padre/maestro se sienten incómodos respondiendo cualquier pregunta, se puede omitir.

|                                                                                                                                                                                                                                                                                                                                                                                                                                                                                                                                                      |                                                                                                                                                                                                                                                                                                                                    |                  |
|------------------------------------------------------------------------------------------------------------------------------------------------------------------------------------------------------------------------------------------------------------------------------------------------------------------------------------------------------------------------------------------------------------------------------------------------------------------------------------------------------------------------------------------------------|------------------------------------------------------------------------------------------------------------------------------------------------------------------------------------------------------------------------------------------------------------------------------------------------------------------------------------|------------------|
| <b>1c. Otras emociones que el niño/a expresa [esta pregunta debe realizarse a todos los participantes]</b><br><b>“Sólo para asegurarme de no haber olvidado de algo, ¿podría decirme alguna emoción que su hijo/a exprese y no haya mencionado?”</b><br><i>Pida un ejemplo si el participante reporta alguna otra emoción – “¿Podría decirme alguna situación en la que expresó eso?”</i>                                                                                                                                                            |                                                                                                                                                                                                                                                                                                                                    | Otras emociones: |
| <b>2. Cómo expresa emociones el niño/a</b><br><b>“Ahora me gustaría hablar acerca de las maneras en que {nombre} expresa sus emociones. Primero, daré una lista de algunas formas en que los niños/as expresan sus emociones y usted solo me dirá “sí” o “no” en cada una. Luego, si algo no he dicho, lo podrá añadir.”</b><br><i>Después, vaya a la lista de la derecha. Pida ejemplos si el padre responde “sí”. A pesar de que tenemos expresiones lingüísticas y no lingüísticas por separado, pase por todas como si fuera una sola lista.</i> | <b>No lingüísticas</b><br>○ Expresiones faciales<br>○ Postura corporal<br>○ Gestos<br>○ Vocalizaciones<br>○ Otros _____                                                                                                                                                                                                            | <b>EJEMPLOS</b>  |
|                                                                                                                                                                                                                                                                                                                                                                                                                                                                                                                                                      | <b>Lingüísticas</b><br>○ Habla<br>○ Signos manuales<br>○ Símbolos/texto en tablero no electrónico<br>○ Símbolos/texto en dispositivo simple de CAA<br>○ Símbolos/texto en dispositivos de CAA con sintetizador<br>○ Símbolos/texto en dispositivos móviles / computadora con aplicaciones/software<br>○ Escritura<br>○ Otros _____ | <b>EJEMPLOS</b>  |
| <b>PUNTO DE RAMIFICACIÓN/CORTE #1.</b><br>+ SI SOLO UTILIZA MÉTODOS <b>“NO LINGÜÍSTICOS”</b> (EXPRESIONES FACIALES HASTA VOCALIZACIONES), PASE A LA <b><u>PREGUNTA #7</u></b><br>+ SI UTILIZA ALGUNO DE LOS MÉTODOS <b>“LINGÜÍSTICOS”</b> (DESDE HABLA A ESCRITURA), PRESENTANDO O NO ALGÚN MÉTODO NO LINGÜÍSTICO, PASE A LA <b><u>PREGUNTA #3</u></b>                                                                                                                                                                                               |                                                                                                                                                                                                                                                                                                                                    |                  |
| <b>3. Cantidad del repertorio de símbolos</b><br><i>Realice la pregunta 3a sólo si se seleccionaron métodos de asistencia (símbolos/texto) en la pregunta #2. De lo contrario, pase a la pregunta 3b.</i><br><b>3a. “¿Cuántas palabras o símbolos para nombrar emociones están disponibles en su sistema de comunicación? Específicamente, ¿cuáles tiene {nombre}?”</b>                                                                                                                                                                              | ○ Menos de 6 símbolos gráficos/palabras<br>○ De 6 a 10 símbolos gráficos/palabras<br>○ 11 a 20 símbolos gráficos/palabras<br>○ Más de 20 símbolos gráficos/palabras<br>○ Más de 50 símbolos gráficos/palabras                                                                                                                      | <b>EJEMPLOS</b>  |



## Desarrollo Temprano de Competencias Emocionales. Una Herramienta para Niños(as) con Necesidades Complejas de Comunicación

|                                                                                                                                                                                                                                                                                                                                                                                                                                                                                                                       |                                                                                                                                                                                                                                                                                                                          |                      |                       |                 |              |                    |
|-----------------------------------------------------------------------------------------------------------------------------------------------------------------------------------------------------------------------------------------------------------------------------------------------------------------------------------------------------------------------------------------------------------------------------------------------------------------------------------------------------------------------|--------------------------------------------------------------------------------------------------------------------------------------------------------------------------------------------------------------------------------------------------------------------------------------------------------------------------|----------------------|-----------------------|-----------------|--------------|--------------------|
| <b>3b. “¿Cuántas señas, palabras u otros símbolos utiliza {nombre} para nombrar emociones? ¿Qué palabras o símbolos específicos utiliza {nombre}”</b>                                                                                                                                                                                                                                                                                                                                                                 | <ul style="list-style-type: none"> <li>o Menos de 6 símbolos gráficos/palabras/señas</li> <li>o De 6 a 10 símbolos gráficos/palabras/señas</li> <li>o De 11 a 20 símbolos gráficos/palabras/señas</li> <li>o Más de 20 símbolos gráficos/palabras/señas</li> <li>o Más de 50 símbolos gráficos/palabras/señas</li> </ul> |                      |                       | <b>EJEMPLOS</b> |              |                    |
| <b>3c. “¿Cuántas señas, palabras u otros símbolos {nombre} utiliza para hablar de las situaciones relacionadas con sus emociones? (p.e. ¿por qué siente esa emoción?, ¿qué quiere?) ¿Qué palabras o símbolos específicos utiliza {nombre}”</b>                                                                                                                                                                                                                                                                        | <ul style="list-style-type: none"> <li>o Menos de 6 símbolos gráficos/palabras/señas</li> <li>o De 6 a 10 símbolos gráficos/palabras/señas</li> <li>o De 11 a 20 símbolos gráficos/palabras/señas</li> <li>o Más de 20 símbolos gráficos/palabras/señas</li> <li>o Más de 50 símbolos gráficos/palabras/señas</li> </ul> |                      |                       | <b>EJEMPLOS</b> |              |                    |
|                                                                                                                                                                                                                                                                                                                                                                                                                                                                                                                       |                                                                                                                                                                                                                                                                                                                          |                      |                       |                 |              |                    |
| <b>4. Contextos en que se usa</b><br><br><b>“¿{nombre} utiliza estas (señas, palabras habladas, y/o símbolos gráficos) en diferentes contextos, como en casa, escuela, actividades de ocio en la comunidad, iglesia, etc.?”</b>                                                                                                                                                                                                                                                                                       | <b>FRECUENTEMENTE</b>                                                                                                                                                                                                                                                                                                    | <b>ALGUNAS VECES</b> | <b>RARAMENTE</b>      | <b>NUNCA</b>    | <b>NO SÉ</b> | <b>COMENTARIOS</b> |
|                                                                                                                                                                                                                                                                                                                                                                                                                                                                                                                       |                                                                                                                                                                                                                                                                                                                          |                      |                       |                 |              |                    |
| <b>5. Nombrando emociones de otros</b><br><br><b>“¿{nombre} nombra o comenta sobre emociones que observa en otras personas? Por favor, dé un ejemplo”</b>                                                                                                                                                                                                                                                                                                                                                             | <b>FRECUENTEMENTE</b>                                                                                                                                                                                                                                                                                                    | <b>ALGUNAS VECES</b> | <b>RARAMENTE</b>      | <b>NUNCA</b>    | <b>NO SÉ</b> | <b>EJEMPLO</b>     |
|                                                                                                                                                                                                                                                                                                                                                                                                                                                                                                                       |                                                                                                                                                                                                                                                                                                                          |                      |                       |                 |              |                    |
| <b>6. Apoyos que da el padre / cuidador para nombrar verbalmente.</b><br><br><b>“Muchas familias/cuidadores tienen diferentes maneras de sugerir al niño/a que nombre alguna emoción. ¿Con qué frecuencia intenta que {nombre} etiquete sus emociones usando palabras, señas o símbolos?”</b><br><br><i>Si el cuidador responde “algunas veces” o “la mayoría de las veces”, pida un ejemplo.</i><br><br><i>Si el cuidador responde “ocasionalmente” o “nunca”, diga: “Bien, gracias. ¿Qué suele hacer entonces?”</i> | <b>LA MAYORÍA DE LAS VECES</b>                                                                                                                                                                                                                                                                                           | <b>ALGUNAS VECES</b> | <b>OCASIONALMENTE</b> | <b>NUNCA</b>    | <b>NO SÉ</b> | <b>EJEMPLO</b>     |

|                                                                                                                                                                                                                                                                                                                                                                                                                                                                 |                                           |                                             |                                               |                          |              |                |
|-----------------------------------------------------------------------------------------------------------------------------------------------------------------------------------------------------------------------------------------------------------------------------------------------------------------------------------------------------------------------------------------------------------------------------------------------------------------|-------------------------------------------|---------------------------------------------|-----------------------------------------------|--------------------------|--------------|----------------|
| <b>7. Respuesta del padre / cuidador</b><br><b>“Cuando {nombre} expresa alguna emoción, ¿usted cómo responde?”</b><br><i>Marque todas las que apliquen y pida ejemplos.</i>                                                                                                                                                                                                                                                                                     | <b>Responde a la emoción por sí misma</b> | <b>Habla sobre las causas de la emoción</b> | <b>Habla sobre cómo solucionar la emoción</b> | <b>Ignora la emoción</b> |              |                |
|                                                                                                                                                                                                                                                                                                                                                                                                                                                                 |                                           |                                             |                                               |                          |              |                |
| <b>8. Reconocimiento/respuesta del niño/a a las emociones</b><br><b>8a. “Hablemos un poco sobre cómo {nombre} responde a las emociones de otros. ¿Cómo reacciona {nombre} cuando otras personas expresan sus emociones? Por ejemplo, ¿{nombre} participa cuando todos están emocionados al ver un evento deportivo [u otro evento apropiado en su cultura]? ¿Qué hace {nombre} cuando un compañero se hace una herida en la rodilla en el patio de juegos?”</b> |                                           |                                             |                                               |                          |              |                |
| <b>8b. “¿Con qué frecuencia {nombre} demuestra dichas respuestas?”</b>                                                                                                                                                                                                                                                                                                                                                                                          | <b>LA MAYORÍA DEL TIEMPO</b>              | <b>ALGUNAS VECES</b>                        | <b>OCASIONALMENTE</b>                         | <b>NUNCA</b>             | <b>NO SÉ</b> | <b>EJEMPLO</b> |
|                                                                                                                                                                                                                                                                                                                                                                                                                                                                 |                                           |                                             |                                               |                          |              |                |
| <b>9. Expresión emocional del cuidador: Parte 1</b><br><b>“Diferentes familias o cuidadores presentan variaciones en cómo se sienten cuando expresan emociones frente a los niños/as. ¿Con qué tipo de emociones se siente cómodo expresando frente a {nombre}? ¿Por qué? y ¿en qué situaciones ocurre?”</b>                                                                                                                                                    |                                           |                                             |                                               |                          |              |                |
|                                                                                                                                                                                                                                                                                                                                                                                                                                                                 |                                           |                                             |                                               |                          |              |                |
| <b>10. Expresión emocional del cuidador: Parte 2</b><br><b>“¿Hay alguna(s) emoción(es) que evite expresar cuando está con {nombre}? ¿Por qué? ¿En qué situaciones ocurre?”</b>                                                                                                                                                                                                                                                                                  |                                           |                                             |                                               |                          |              |                |

|                                                                                                                                                                                                                                                                                                                                                                                        |                |               |           |       |       |         |
|----------------------------------------------------------------------------------------------------------------------------------------------------------------------------------------------------------------------------------------------------------------------------------------------------------------------------------------------------------------------------------------|----------------|---------------|-----------|-------|-------|---------|
|                                                                                                                                                                                                                                                                                                                                                                                        |                |               |           |       |       |         |
| <b>11. Estrategias de adquisición</b><br><b>“Cuando comparte o habla sobre emociones con su hijo/a, ¿qué dice o hace? Por ejemplo, ¿leen juntos libros sobre emociones? ¿Le explica la emoción? ¿La demuestra de alguna forma?”</b>                                                                                                                                                    |                |               |           |       |       |         |
|                                                                                                                                                                                                                                                                                                                                                                                        |                |               |           |       |       |         |
| <b>12. Manejando situaciones estresantes</b><br><b>“Todos experimentamos ansiedad antes o durante alguna tarea difícil o desafiante. ¿Cómo se preparan (su hijo/a y usted) para dichas tareas o eventos? y ¿Cómo logran calmarse después? ¿Qué parece funcionarles mejor?” (p.e. visitas al hospital, primer día de escuela, etc.)</b>                                                 |                |               |           |       |       |         |
|                                                                                                                                                                                                                                                                                                                                                                                        |                |               |           |       |       |         |
| <b>13. Interactuando con otros medios de comunicación (libros, videos, etc.) - general</b><br><b>“¿{nombre} disfruta escuchando (y/o leyendo) historias, viendo videos, etc.? [Esta pregunta resalta la importancia que tienen los libros, cuentos, videos y otros medios de comunicación para mostrar al niño/a situaciones que involucran emociones.] ¿Podría darme un ejemplo?”</b> | FRECUENTEMENTE | ALGUNAS VECES | RARAMENTE | NUNCA | NO SÉ | EJEMPLO |
|                                                                                                                                                                                                                                                                                                                                                                                        |                |               |           |       |       |         |
| <b>14. Interactuando con otros medios de comunicación (libros, videos, etc.) – de adquisición</b><br><b>“Cuando está leyendo libros o viendo TV/películas, ¿Habla sobre las emociones que los personajes están experimentando?”</b>                                                                                                                                                    | SI             | NO            | EJEMPLO   |       |       |         |
|                                                                                                                                                                                                                                                                                                                                                                                        |                |               |           |       |       |         |

Este es el final de la herramienta EDEC.

¡Gracias por su participación!
