# Supplementary material
Source: publisher figshare collection journal article supplement (https://asha.figshare.com/articles/dataset/_/14219777)
Supplement: Supplementary file 2 [file 2]

# El Perfil de Desarrollo Temprano de Competencias Emocionales (EDEC-P): Proceso de Aplicación Sugerido

Rangel-Rodríguez, Badia, Blanch, and Wilkinson (2020)

Información de contacto: Gabriela A. Rangel-Rodríguez (gabriela.rangelr@gmail.com)

## Acerca del Perfil EDEC (EDEC-P)

### ¿Qué es el EDEC-P?

El Perfil de Desarrollo Temprano de Competencias Emocionales [por sus siglas en inglés: Early Development of Emotional Competence Profile (EDEC-P)] es un perfil de apoyo para que el profesional resuma la información obtenida de la herramienta EDEC (ver: Na, Wilkinson y Liang, 2017) y presente un análisis de los retos percibidos, pasos siguientes en la intervención y posibles estrategias para alcanzar objetivos relacionados con promover una comunicación emocional en personas con necesidades complejas de comunicación (NCC) que pueden beneficiarse de comunicación aumentativa y alternativa (CAA).

### ¿Por qué desarrollamos el EDEC-P?

Al igual que con la herramienta EDEC (Na, Wilkinson y Liang, 2017), el EDEC-P busca conscientizar sobre la relación entre el lenguaje y las competencias emocionales, y asegurar que la intervención comunicativa y psicológica de un individuo con NCC deba incluir el lenguaje para hablar de las emociones en formas que sean consistentes con los valores y metas del contexto sociocultural del individuo. El EDEC-P también se desarrolló con el propósito de ser compartido con padres, madres y/o profesionales (escuela, otros clínicos) para crear conciencia y comprender el estado emocional de la persona con NCC, así como proponer pautas para fomentar el desarrollo emocional del niño/a y orientar el diseño e intervención en CAA.

### ¿Quién usa la plantilla EDEC-P?

Logopedas, terapeutas de lenguaje, psicólogos/as y otros profesionales (por ejemplo, terapeutas ocupacionales) que trabajan con personas con NCC y desean orientar la toma de decisiones clínicas sobre próximas intervenciones a nivel emocional y comunicativo.

## Idiomas

El EDEC-P está diseñado para usarse en diferentes idiomas. Actualmente, tenemos disponibles versiones en inglés y español. Comuníquese con el autor para la traducción a otros idiomas.

## Contenidos y Organización

### Sección 1 "Sobre mí":

incluye una imagen o fotografía del niño/a e información sobre el/ella, sus fortalezas, emociones y habilidades comunicativas, así como información obtenida sobre los compañeros/as de comunicación.

Formas en que la gente se comunica conmigo:

Actualmente, para comunicarme utilizo:

Emociones que expreso:

Actualmente, expreso mis emociones con:

Cuando otros expresan sus emociones, yo:

Maneras actuales en que las personas responden cuando siento una emoción:

**Sección 2 "Retos y Estrategias":** establece los objetivos de comunicación emocional esperados a corto plazo, así como una presentación de los retos y estrategias sugeridas para la intervención con el niño/a y sus compañeros/as de comunicación.

RETOS Y ESTRATEGIAS (sobre desarrollo emocional y comunicación)

OBJETIVO:

RETOS DEL NIÑO/A

RETOS Y OBJETIVOS DE LOS COMPAÑEROS DE COMUNICACIÓN

ESTRATEGIAS PARA ALCANZAR EL OBJETIVO DEL NIÑO/A

ESTRATEGIAS PARA LOS COMPAÑEROS DE COMUNICACIÓN

Hecho por:

(Nombre)

(Credenciales/Título)

(Institución)

(Email)

(Fecha)

EDEC-P plantilla desarrollada por Rangel-Rodríguez, 2020

## Proceso Sugerido para Usar el EDEC-P

- 1 **Administra la Entrevista EDEC**
- 2 **Extrae y Organiza la Información Recabada (Completa la Sección 1)**
- 3 **Identifica los Retos del Niño/a y sus Compañeros/as de Comunicación.**
- 4 **Crea un Plan para Fomentar las Competencias Emocionales y Comunicativas (Completa la Sección 2)**
- 5 **Comparte el EDEC-P y Obtén Retroalimentación.**

### Paso 1: Administra la Entrevista EDEC a las y los Compañeros de Comunicación.

Es fundamental que la persona que realiza la entrevista se familiarice con la herramienta EDEC y sus objetivos. Sentirse cómodo con el propósito de la entrevista, el lenguaje y las preguntas sugeridas ayudará a:

- a) acompañar al entrevistado en caso de confusión con cualquier término o duda
- b) permitir que el evaluador haga otras preguntas que le ayuden a tener una mejor perspectiva del estado actual emocional y comunicativo de la persona con NCC, y tener una visión clara de su contexto social (antecedentes socioculturales y respuestas comunes que el entorno hace a las expresiones emocionales del niño/a).

### Paso 2: Extrae y Organiza la Información Recabada.

Es posible que, en el transcurso de la entrevista, los entrevistados hayan dado una respuesta a una pregunta, pero más adelante ampliar la respuesta anterior o viceversa (hablar sobre un tema que se discutirá posteriormente en la entrevista). Muchas veces la información se expresará de forma orgánica durante el transcurso de la entrevista. Por lo tanto, para completar la primera sección del EDEC-P, es importante releer la entrevista, extraer y organizar la información recopilada en áreas específicas:

**1. Las Características del Niño/as:** ¿Quién es el niño/a? – ¿Cuáles son sus intereses/pasatiempos? ¿Qué disfruta? ¿Qué le desagrada?

**2. La Comunicación de las y los Compañeros de Comunicación:** ¿Cómo el entorno se comunica con el niño/a? – ¿Qué necesita el niño/a de sus compañeros/as de comunicación para entender mejor su entorno? ¿Qué tipo de apoyos da el entorno para favorecer la comunicación con el/la niño/a?

**3. Los Métodos de Comunicación del Niño/a:** ¿Qué métodos (lingüísticos y no lingüísticos) utiliza el niño/a para comunicarse? ¿Qué métodos están a su alcance/disposición?

**4. El Mundo Emocional del Niño/a:** ¿Cuáles son las emociones que el entorno puede reconocer en el niño/a? ¿Qué emociones siente/expresa el niño/a?

**5. Las Expresiones Emocionales del Niño/a:** ¿Cómo nota el entorno que el niño/a está experimentando una emoción?, ¿Qué expresiones se interpretan como una emoción?, ¿Cómo expresa el niño/a sus emociones (modos lingüísticos y no lingüísticos)? ¿Cuál es la expresión emocional preferente del niño/a?

**6. El Reconocimiento y las Respuestas del Niño/a ante Emociones de Otros:** ¿El niño/a responde a expresiones emocionales de los demás? ¿Cómo? ¿El niño/a tiene formas de responder a los estados emocionales de los demás? ¿Cuáles?

**7. El Apoyo Emocional del Entorno:** ¿Cómo responden las y los compañeros de comunicación ante las emociones del niño/a? ¿Apoyan al niño/a a pasar de una emoción desagradable a una agradable? ¿Cómo? ¿Identifican qué necesita el niño/a? ¿De qué forma?

Escribe la información específica en el área correspondiente de la primera página (sección 1) de la plantilla EDEC-P. Te sugerimos que escribas la primera parte del perfil en primera persona; consideramos que, al hacerlo de esta manera, hay un impacto mayor en el lector y facilita la comprensión de una forma amigable.

Esta área muestra algunas características del niño/a (información general, temperamento, intereses/pasatiempos, lo que le gusta/no le gusta).

Añade una imagen  
aquí

Mi nombre es: \_\_\_\_\_

Tengo: \_\_\_\_ años

**Sobre mí**

Me gusta:

No me gusta:

Mis juegos favoritos:

Estos datos fueron reportados por: \_\_\_\_

Formas en que la gente se comunica conmigo:

Actualmente, para comunicarme utilizo:

Emociones que expreso:

Frecuentemente

Algunas veces

:

:

:

:

Actualmente, expreso mis emociones con:

Cuando otros expresan sus emociones, yo:

Maneras actuales en que las personas responden cuando siento una emoción:

Esta parte describe la comunicación general en dos niveles:

- a) La comunicación de las/los compañeros de comunicación: ¿Cómo otras personas se comunican con el niño/a (en general)?
- b) Los métodos de comunicación del niño/a: ¿Qué métodos utiliza el niño/a para comunicarse? y ¿Cuáles están disponibles?

Este apartado se enfoca en:

- a) Las emociones del niño/a (reconocidas por las/los entrevistados)
- b) Las maneras actuales que el niño/a usa para expresar emociones.
- c) El reconocimiento y respuesta que da el niño/a ante emociones de otros.

Esta área da información acerca del apoyo que dan las y los compañeros de comunicación en el área emocional: Actualmente ¿Cómo responde el entorno ante expresiones emocionales del niño/a?

### Paso 3: Identifica los Retos del Niño/a y del Entorno (Compañeros de Comunicación).

Identifica los retos del niño/a y de sus compañeros/as de comunicación relacionados con el área emocional y comunicativa. ¿hay algo que pueda mejorar la comunicación sobre las emociones con el niño/a? Presta atención especial a:

#### Persona con NCC

- Modos de comunicación emocional.
- Lenguaje emocional receptivo y expresivo: nombra/etiqueta emociones, explica/entiende emociones (sus posibles causas), y respuestas ante una emoción (¿qué necesita/puede hacer el niño/a ante una emoción específica?).
- Uso y disponibilidad de expresiones emocionales lingüísticas (vocabulario emocional actual para expresar emociones y hablar de ellas).

*¿Cuáles son los desafíos/retos emocionales del niño/a? ¿Cuáles serían los retos del niño/a para lograr el objetivo propuesto? ¿Son suficientes los medios existentes de expresión emocional del niño/a para satisfacer sus necesidades? ¿Existen algunos retos relacionados con su CAA? ¿Hay algunos desafíos a nivel conductual? ¿Desafíos motivacionales? ¿Barreras en la comunicación?*

#### Compañeros/as de Comunicación

- Reconocimiento emocional del niño/a con NCC.
- Respuestas a emociones.
- Creencias sobre hablar de emociones con otros (y especialmente al hablar con la persona con NCC).
- Emociones con las que se sienten cómodos/incómodos expresar frente a la persona con NCC.
- Vocabulario y expresión emocional (palabras utilizadas, formas de expresión emocional que son aceptadas en el entorno).
- Apoyos brindados al niño/a que fomentan la comunicación (en general y acerca de las emociones).

*¿Cómo puede el entorno ayudar al niño/a a expresar sus emociones? ¿Cuáles son los desafíos/retos de las y los compañeros de comunicación? ¿Dan oportunidades para promover el desarrollo emocional? ¿Hay algunas emociones que prefieren evitar? ¿Tienen una preocupación específica sobre el niño/a referente a las emociones? ¿Es posible acompañarlos en ello?*

#### Contexto

- Posibles oportunidades para hablar de emociones.
- Eventos o situaciones socioculturales específicos que puedan ser de interés para hablar de emociones.

*¿Qué actividades pueden ser agradables y divertidas para el niño/a y sus compañeros/as de comunicación que puedan fomentar el hablar sobre las emociones?*

#### Paso 4: Elabora un Plan que Fomente las Habilidades/Competencias Emocionales y Comunicativas.

Una vez identificados los retos, establece metas y objetivos que se centren en la promoción del desarrollo de habilidades emocionales y comunicativas. *¿Cuáles son las necesidades emocionales del niño/a? ¿Qué objetivos podrían ser beneficiosos para el niño/a? ¿Qué necesita el niño/a de sus compañeros/as de comunicación para obtener el objetivo propuesto (considera la información recopilada sobre las y los compañeros de comunicación del niño/a)?*

Piensa en estrategias para alcanzar cada objetivo: *¿Qué necesitan las y los involucrados para lograr el objetivo? ¿Tener un espacio de acompañamiento e instrucción específica? ¿Aumentar el vocabulario? ¿Diseñar tableros CAA? ¿Identificar dónde y cómo hablar sobre las emociones? ¿Ofrecer oportunidades comunicativas en entornos naturales? ¿Introducir apoyos específicos?*

Prioriza los objetivos (acorde al desarrollo del niño/a) y determina los pasos y estrategias que se deben tomar a corto plazo para lograr el primer objetivo. Escríbelo en el área correspondiente de la segunda página (sección 2) de la plantilla del EDEC-P.

**En este paso, presta especial atención a:**

- Los intereses del niño/a y sus compañeros/as de comunicación (las primeras estrategias sugeridas deben ser aplicables en situaciones divertidas y cómodas para ambos).
- Situaciones/actividades que ya realizan (identifica si ellos pueden crear oportunidades para promover conversaciones emocionales en momentos que ya comparten en su día a día).

Este apartado está destinado a presentar:

- a) Los retos del niño/a para alcanzar el objetivo sugerido.
- b) Las estrategias propuestas para alcanzar el objetivo.

Información acerca del evaluador que llenó el EDEC-P.

| RETOS Y ESTRATEGIAS<br>(sobre desarrollo emocional y comunicación)                              |                                                                               |
|-------------------------------------------------------------------------------------------------|-------------------------------------------------------------------------------|
| OBJETIVO:                                                                                       |                                                                               |
| <b>RETOS DEL NIÑO/A</b><br>.<br>.<br>.                                                          | <b>RETOS Y OBJETIVOS DE LOS<br/>COMPAÑEROS DE COMUNICACIÓN</b><br>.<br>.<br>. |
| <b>ESTRATEGIAS PARA ALCANZAR EL<br/>OBJETIVO DEL NIÑO/A</b><br>.<br>.                           | <b>ESTRATEGIAS PARA LOS COMPAÑEROS DE<br/>COMUNICACIÓN</b><br>.<br>.<br>.     |
| <b>Hecho por</b><br>(Nombre)<br>(Credenciales/títulos)<br>(Instituciones)<br>(Email)<br>(Fecha) |                                                                               |

Esta área propone el objetivo a alcanzar a corto plazo.

Esta parte demuestra información acerca de las y los compañeros de comunicación:

- a) Retos y objetivos de las y los compañeros de comunicación relacionados con el objetivo arriba sugerido.
- b) Estrategias sugeridas a las y los compañeros de comunicación para lograr el objetivo.

EDEC-P plantilla desarrollada por Rangel-Rodríguez, 2020

## Paso 5: Comparte el EDEC-P y Obtén Retroalimentación.

Comparte el perfil con el adulto. Verifica si los datos presentados en la primera sección son correctos y si las y los compañeros de comunicación desean evitar, agregar o cambiar algún contenido. Explica la segunda página y asegúrate de que el objetivo, los retos y las estrategias sugeridas son claras y las/los compañeros de comunicación están de acuerdo con ellas. En caso de dudas, acompaña a los adultos y explica, comenta y ajusta el plan hasta que las personas involucradas comprendan y se sientan cómodas con el plan. Si es necesario, realiza cambios al perfil. Recuerda que la plantilla propuesta puede ser modificada y presentada de otra forma dependiendo de la retroalimentación y las necesidades específicas del niño/a y sus compañeros/as de comunicación.

En la medida de lo posible, consideramos importante compartir también el EDEC-P con la persona con NCC y preguntar si se siente cómodo/a con la información escrita en la primera sección. Si la respuesta es negativa, identifica qué área preferirían editar, agregar o cambiar, haz las modificaciones adecuadas hasta que la persona con NCC se sienta cómoda y con la sensación de que se respeta su privacidad emocional. Además, pregunta con quién le gustaría compartir el EDEC-P, para que otros le conozcan mejor y le acompañen a tener más conversaciones sobre emociones. Un ejemplo de cómo presentar esto a las personas con NCC podría ser:

“

*Queremos compartir algunas cosas sobre ti con tus profesores para que puedan conocerte mejor. Esto les ayudará a comprender mejor tus emociones y a brindarte un apoyo eficaz si es necesario.*

*¿Te gusta? ¿Te gustaría compartir esto? ¿Con quién? ¿Te gustaría agregar algo más? ¿Hay algo que prefieras evitar?*

”

Dependiendo de la capacidad del niño/a para comprender y expresar sus ideas, el evaluador/a puede hacer preguntas específicas para determinar el nivel de satisfacción del niño/a y su retroalimentación.

## Seguimiento Sugerido

Te sugerimos dar seguimiento al plan propuesto en el EDEC-P. Puede ser necesario volver a administrar la entrevista EDEC y rehacer el EDEC-P para informar el estado emocional y comunicativo actual del niño/a, identificar el impacto de las estrategias ejecutadas y apoyar el nuevo proceso de toma de decisiones hacia los siguientes pasos para continuar con el fomento al desarrollo de habilidades emocionales y comunicativas.
